# Supplementary material
Source: publisher site journal article supplement (https://www.dovepress.com/article/600117)
Supplement: Supplementary file 1 [file 600117_Supplementary%20Figure%20S1_1.pdf]

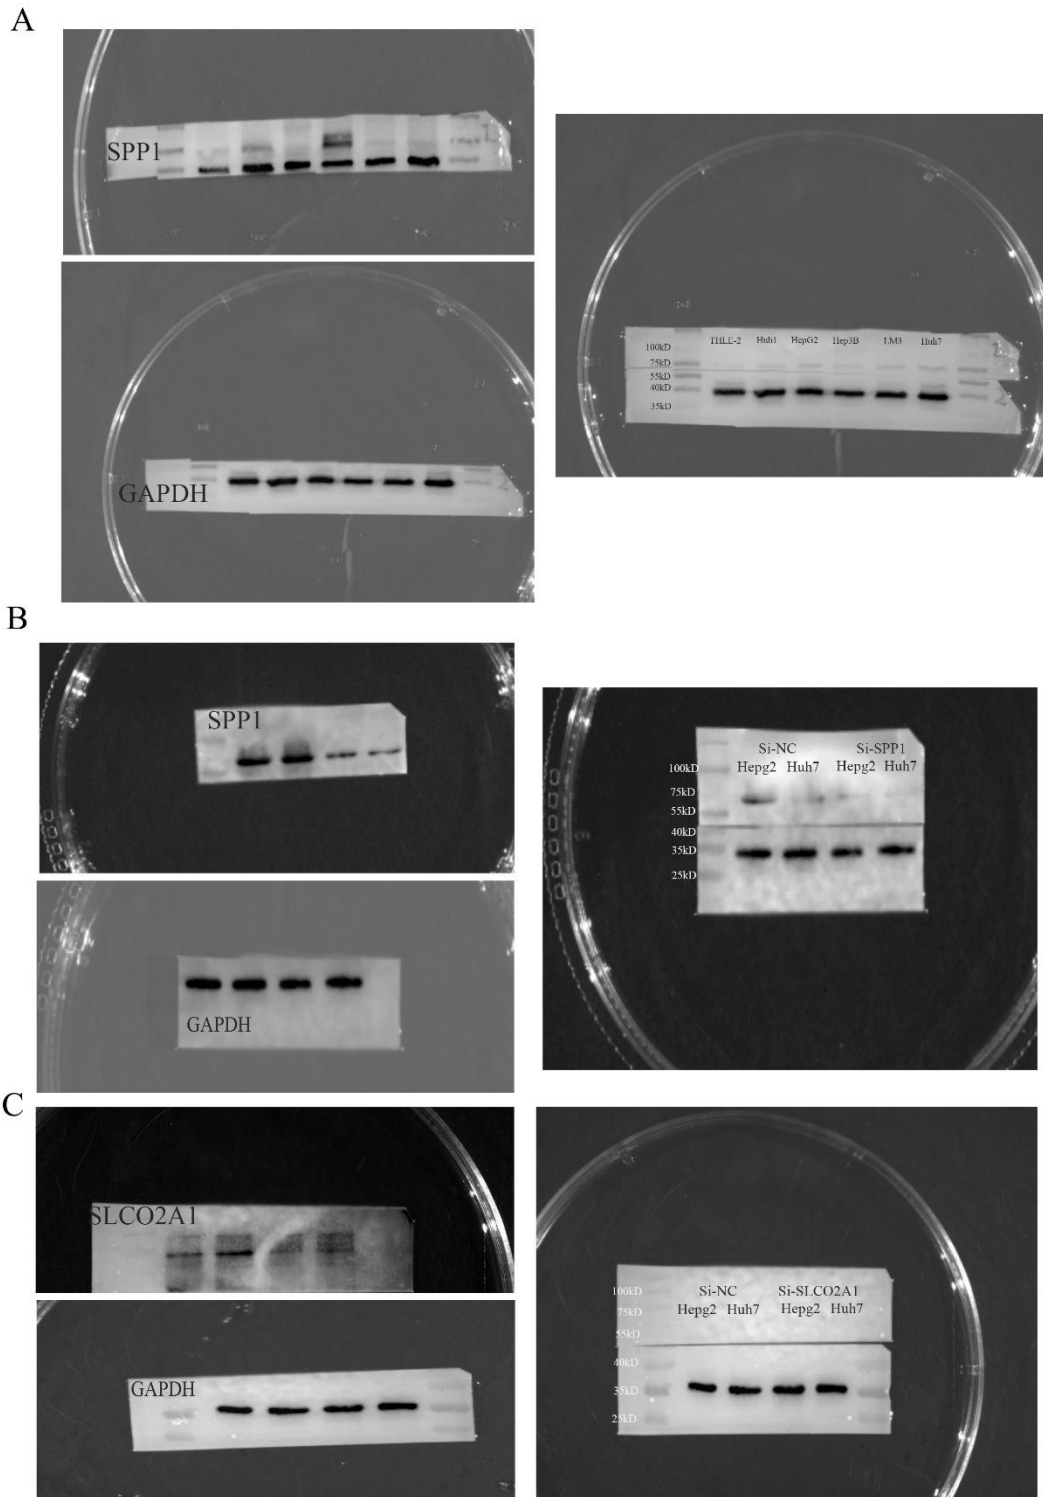

**Supplementary Figure S1. Raw western blot images.**

(A) SPP1 expression in THLE-2 (normal hepatocytes) and HCC cell lines (Huh1, HepG2, Hep3B, LM3, Huh7). Loading control: GAPDH. Cropped bands correspond to

main Fig. 7C. (B) SPP1 expression in control vs. si-SPP1 knockdown HepG2 and Huh7 cells. Loading control: GAPDH. Cropped bands correspond to the left panel of main Figure 7D. (C) SLC2A1 expression in control vs. siRNA knockdown HepG2 and Huh7 cells. Loading control: GAPDH. Cropped bands correspond to the right panel of main Figure 7D.
